# Supplementary material
Source: PubMed Central journal article supplement (PMC3256244)
Supplement: NIHMS344139-supplement-1_si_001.pdf [file NIHMS344139-supplement-1_si_001.pdf]

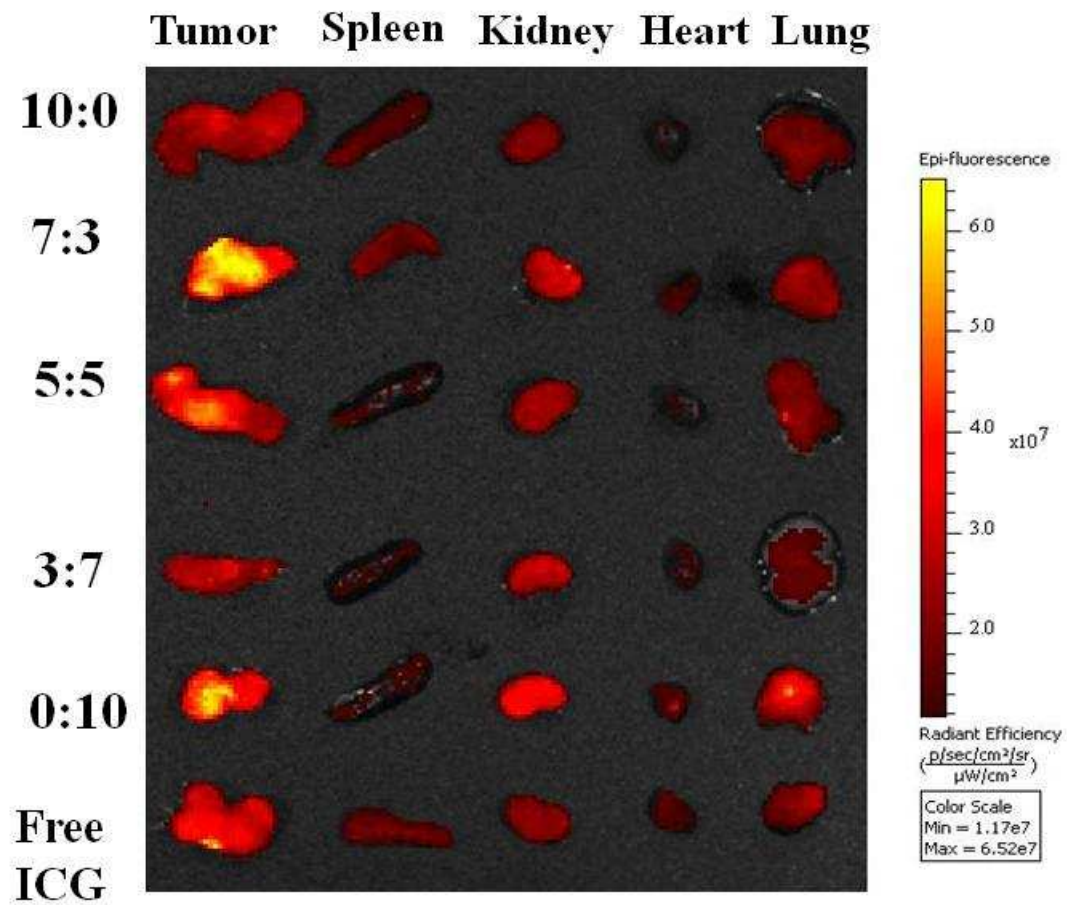

Supplementary Figure 1: Representative ICG fluorescence from major organs and tumor 24 hours post-injection of ICG-micelles.
